# Supplementary material for: MgO modified nanoporous carbon composites for methanol separation
Source: Royal Society of Chemistry journal article supplement (doi:10.1039/c3ra41081a), 2013-01-01
Supplement: c3ra41081a.pdf [file c3ra41081a.pdf]

## Supporting information

### MgO modified nanoporous carbon composites for methanol separation

Xiaoyu Ma, Minhua Cao\* and Changwen Hu\*

Key Laboratory of Cluster Science, Ministry of Education of China, Department of Chemistry, Beijing Institute of Technology, Beijing 100081, P. R. China.

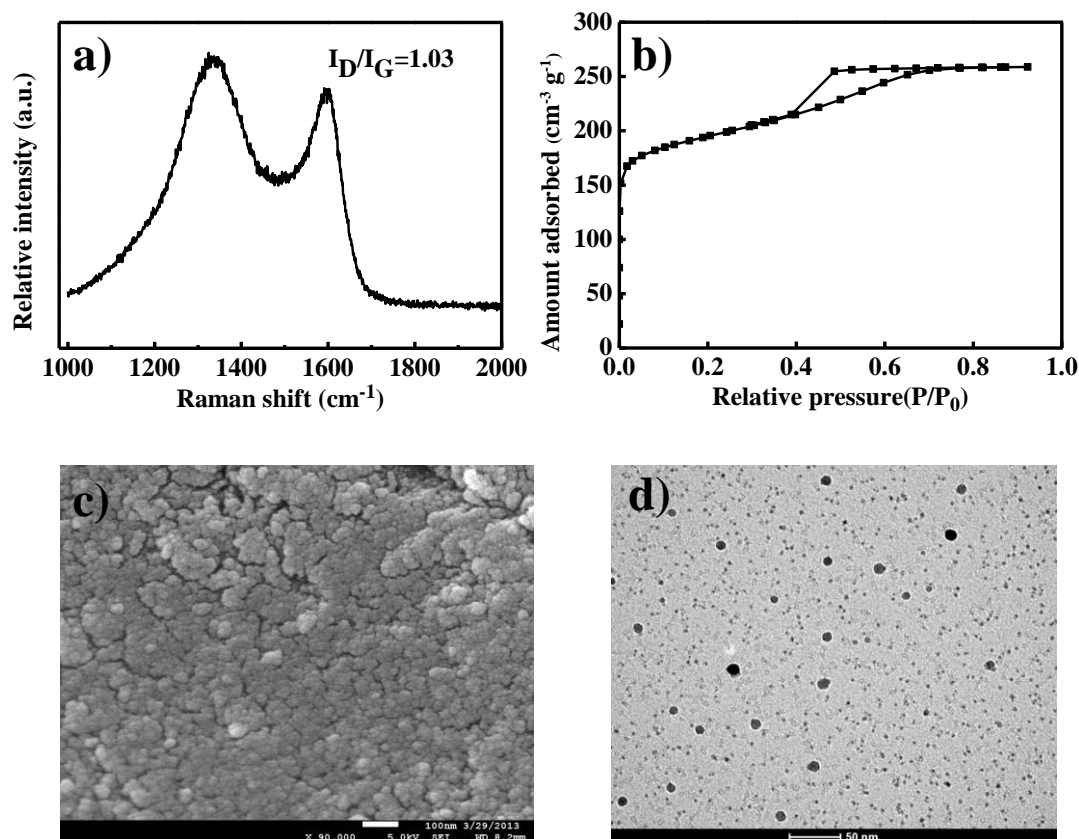

Fig. S1 Raman spectrum (a), N<sub>2</sub> sorption isotherm (b), FE-SEM image (c) and TEM image of activated carbon.
